# Supplementary material for: The genetic basis of divergent melanic pigmentation in benthic and limnetic threespine stickleback
Source: Research Square preprint supplement (doi:10.21203/rs.3.rs-3093539/v1), 2023-06-28
Supplement: Supplementary file 1 [file 2734a5100666abe75292e5f7.xlsx]

## Sheet: S6
Start-pos	End-pos	Gene	GeneID	Chr	QTL	Phenotype	Pigmentation
3762380	3766951	fen1	ENSGACG00000002244	21	All-family	Lateral barring
3768790	3773319	tm9sf1	ENSGACG00000002268	21	All-family	Lateral barring
3782069	3790368	ipo4	ENSGACG00000002276	21	All-family	Lateral barring
3790782	3792345	si:ch211-196f5.2	ENSGACG00000002283	21	All-family	Lateral barring
3802461	3815446	pdcd6	ENSGACG00000002286	21	All-family	Lateral barring
3831486	3862459	bmp6	ENSGACG00000002307	21	All-family	Lateral barring
3864931	3870038	txndc5	ENSGACG00000002309	21	All-family	Lateral barring
3882173	3884823	bloc1s5	ENSGACG00000002321	21	All-family	Lateral barring	Yes	Human, mice, zebrafish
3900261	3905214	eef1e1	ENSGACG00000002324	21	All-family	Lateral barring
3947748	3952816	slc35b3	ENSGACG00000002326	21	All-family	Lateral barring
4261159	4273924	tfap2a	ENSGACG00000002334	21	All-family	Lateral barring	Yes	Human, mice, zebrafish
4277438	4278361	tmem14ca	ENSGACG00000002339	21	All-family	Lateral barring
4278332	4288965	mak	ENSGACG00000002347	21	All-family	Lateral barring
4290174	4294183	plcxd2	ENSGACG00000002359	21	All-family	Lateral barring
4314154	4328506	phldb2b	ENSGACG00000002362	21	All-family	Lateral barring
4331408	4341363	tlcd4a	ENSGACG00000002369	21	All-family	Lateral barring
4343544	4350834	bco1	ENSGACG00000002374	21	All-family	Lateral barring	Yes	Threespine stickleback
4357626	4363242	zc2hc1a	ENSGACG00000002385	21	All-family	Lateral barring
4512532	4571118	ctnnd2a	ENSGACG00000002390	21	All-family	Lateral barring
4578617	4586998	dap	ENSGACG00000002394	21	All-family	Lateral barring
4591348	4602711	ankrd33ba	ENSGACG00000002395	21	All-family	Lateral barring
4613446	4616448	ropn1l	ENSGACG00000002399	21	All-family	Lateral barring
4633729	4636042	ropn1l	ENSGACG00000002402	21	All-family	Lateral barring
4677000	4686452	nup58	ENSGACG00000002406	21	All-family	Lateral barring
4687222	4696475	mtmr6	ENSGACG00000002411	21	All-family	Lateral barring
4702544	4704622	amer2	ENSGACG00000002415	21	All-family	Lateral barring
4917563	4971561	zfhx4	ENSGACG00000002418	21	All-family	Lateral barring
4988901	4989839	pex2	ENSGACG00000002421	21	All-family	Lateral barring
5116106	5122491	hnf4g	ENSGACG00000002422	21	All-family	Lateral barring
5124542	5127345	GPR141	ENSGACG00000002425	21	All-family	Lateral barring
5128905	5139108	pign	ENSGACG00000002426	21	All-family	Lateral barring
5140167	5165738	relch	ENSGACG00000002435	21	All-family	Lateral barring
5182082	5185794	si:dkey-73n8.3	ENSGACG00000002444	21	All-family	Lateral barring
5186922	5193840	si:dkey-94e7.2	ENSGACG00000002448	21	All-family	Lateral barring
5195179	5243575	tpk1	ENSGACG00000002460	21	All-family	Lateral barring
5283848	5560806	CNTNAP2	ENSGACG00000002461	21	All-family	Lateral barring
5563933	5565402	ptgdsb.1	ENSGACG00000002475	21	All-family	Lateral barring
5566443	5569736	c8g	ENSGACG00000002477	21	All-family	Lateral barring
5570723	5573618	msrb2	ENSGACG00000002478	21	All-family	Lateral barring
5574282	5581150	armc3	ENSGACG00000002485	21	All-family	Lateral barring
5583448	5603633	pip4k2aa	ENSGACG00000002491	21	All-family	Lateral barring
5609584	5615358	spag6	ENSGACG00000002493	21	All-family	Lateral barring
5618122	5622349	bmi1a	ENSGACG00000002494	21	All-family	Lateral barring
5627431	5630858	commd3	ENSGACG00000002498	21	All-family	Lateral barring
5653839	5689259	mllt10	ENSGACG00000002505	21	All-family	Lateral barring
5734019	5738065	pdia4	ENSGACG00000002512	21	All-family	Lateral barring
5738223	5745177	GPT	ENSGACG00000002519	21	All-family	Lateral barring
5747557	5751896	ppp1r16a	ENSGACG00000002531	21	All-family	Lateral barring
5768154	5778431	oplah	ENSGACG00000002536	21	All-family	Lateral barring
5790345	5795969	shrprbck1r	ENSGACG00000002544	21	All-family	Lateral barring
5808646	5870440	myrip	ENSGACG00000002551	21	All-family	Lateral barring	Yes	Human, mice, zebrafish
5894383	5895537	ndufb4	ENSGACG00000002553	21	All-family	Lateral barring
5895782	5903328	hgd	ENSGACG00000002559	21	All-family	Lateral barring
5926309	5963001	pola1	ENSGACG00000002594	21	All-family	Lateral barring	Yes	Human, mice, zebrafish
5965675	5971025	pcyt1ba	ENSGACG00000002599	21	All-family	Lateral barring
5974334	5978352	pdk3a	ENSGACG00000002603	21	All-family	Lateral barring
5980270	5988791	slc51a	ENSGACG00000002620	21	All-family	Lateral barring
5992600	5997872	sdhhc20b	ENSGACG00000002625	21	All-family	Lateral barring
5998568	6008658	march6	ENSGACG00000002631	21	All-family	Lateral barring
6010384	6012874	cmbl	ENSGACG00000002636	21	All-family	Lateral barring
6013666	6017677	cct5	ENSGACG00000002643	21	All-family	Lateral barring
6017697	6038095	mtrr	ENSGACG00000002662	21	All-family	Lateral barring
6065576	6128487	sema5a	ENSGACG00000002670	21	All-family	Lateral barring
6175595	6182961	si:dkey-118j18.2	ENSGACG00000002677	21	All-family	Lateral barring
6183073	6185026	TIMM21	ENSGACG00000002680	21	All-family	Lateral barring
6189464	6240135	neto1l	ENSGACG00000002682	21	All-family	Lateral barring
6289750	6291376	cbln2b	ENSGACG00000002693	21	All-family	Lateral barring
6398964	6400574	socs6	ENSGACG00000002698	21	All-family	Lateral barring
6406865	6431202	rttn	ENSGACG00000002700	21	All-family	Lateral barring
6434107	6436140	cd226	ENSGACG00000002708	21	All-family	Lateral barring
6446899	6474452	dok6	ENSGACG00000002710	21	All-family	Lateral barring
6484786	6495419	crispld1a	ENSGACG00000002714	21	All-family	Lateral barring
6504850	6508030	pi15a	ENSGACG00000002723	21	All-family	Lateral barring
6530309	6533659	gdap1	ENSGACG00000002727	21	All-family	Lateral barring
6534938	6558550	jph1a	ENSGACG00000002744	21	All-family	Lateral barring
6564963	6566999	eloca	ENSGACG00000002748	21	All-family	Lateral barring
6568444	6575898	ube2w	ENSGACG00000002752	21	All-family	Lateral barring
6579026	6642145	stau2	ENSGACG00000002757	21	All-family	Lateral barring
6648367	6656819	rdh10a	ENSGACG00000002765	21	All-family	Lateral barring
6658948	6662180	rpl7	ENSGACG00000002767	21	All-family	Lateral barring
6671169	6674187	SBSPON	ENSGACG00000002788	21	All-family	Lateral barring
6682621	6742679	KCNB2	ENSGACG00000002793	21	All-family	Lateral barring
6761590	6775206	trpa1b	ENSGACG00000002794	21	All-family	Lateral barring
6777503	6777928	msc	ENSGACG00000002802	21	All-family	Lateral barring
6826891	6855061	eya1	ENSGACG00000002803	21	All-family	Lateral barring
6900599	6902079	xkr9	ENSGACG00000002808	21	All-family	Lateral barring
6903787	6909004	tram1	ENSGACG00000002818	21	All-family	Lateral barring
6911713	6953777	ncoa2	ENSGACG00000002822	21	All-family	Lateral barring
6960347	6963454	prdm14	ENSGACG00000002829	21	All-family	Lateral barring
6981536	7001063	slco5a1a	ENSGACG00000002831	21	All-family	Lateral barring
7005039	7035292	sulf1	ENSGACG00000002837	21	All-family	Lateral barring	Yes	Human, mice, zebrafish
7075053	7102135	C8orf34	ENSGACG00000002842	21	All-family	Lateral barring
7111029	7173655	prex2	ENSGACG00000002845	21	All-family	Lateral barring
7179938	7191684	cpa6	ENSGACG00000002857	21	All-family	Lateral barring
7193639	7227151	arfgef1	ENSGACG00000002879	21	All-family	Lateral barring
7239829	7243964	cops5	ENSGACG00000002896	21	All-family	Lateral barring
7247243	7250822	pp1r42	ENSGACG00000002909	21	All-family	Lateral barring
7252547	7254333	TCF24	ENSGACG00000002911	21	All-family	Lateral barring
7252896	7262425	MCMDC2	ENSGACG00000002913	21	All-family	Lateral barring
7262834	7271765	SGK3	ENSGACG00000002922	21	All-family	Lateral barring
7275543	7280619	mybl1	ENSGACG00000002964	21	All-family	Lateral barring
7290562	7291629	rrs1	ENSGACG00000002969	21	All-family	Lateral barring
7305661	7306888	crhb	ENSGACG00000002971	21	All-family	Lateral barring
7308799	7311737	trim55b	ENSGACG00000002973	21	All-family	Lateral barring
7317660	7331681	pde7a	ENSGACG00000002974	21	All-family	Lateral barring
7333151	7334309	mtfr1	ENSGACG00000002983	21	All-family	Lateral barring
7337019	7342720	armc1	ENSGACG00000002986	21	All-family	Lateral barring
7409163	7409966	bhlhe22	ENSGACG00000002995	21	All-family	Lateral barring
7467320	7472869	ythdf3	ENSGACG00000002998	21	All-family	Lateral barring
7474167	7477313	tagln3b	ENSGACG00000003004	21	All-family	Lateral barring
7478290	7481292	tagln3a	ENSGACG00000003016	21	All-family	Lateral barring
7487166	7488409	c1qtnf9	ENSGACG00000003040	21	All-family	Lateral barring
7497425	7501855	spata13	ENSGACG00000003047	21	All-family	Lateral barring
7503400	7508618	TMPRSS7	ENSGACG00000003053	21	All-family	Lateral barring
7519692	7540702	flt1	ENSGACG00000003066	21	All-family	Lateral barring
7545194	7552587	pan3	ENSGACG00000003081	21	All-family	Lateral barring
7564026	7564669	urad	ENSGACG00000003095	21	All-family	Lateral barring
7565291	7567878	pdx1	ENSGACG00000003099	21	All-family	Lateral barring
7569977	7571996	si:ch211-140b10.6	ENSGACG00000003100	21	All-family	Lateral barring
7575402	7582561	lnx2a	ENSGACG00000003102	21	All-family	Lateral barring
7582349	7584676	gtf3ab	ENSGACG00000003107	21	All-family	Lateral barring
7589962	7592505	rpl21	ENSGACG00000003110	21	All-family	Lateral barring
7593074	7598419	usp12a	ENSGACG00000003114	21	All-family	Lateral barring
7600074	7601093	gpr12	ENSGACG00000003145	21	All-family	Lateral barring
7605441	7613959	wasf3b	ENSGACG00000003147	21	All-family	Lateral barring
7616147	7622264	cdk8	ENSGACG00000003151	21	All-family	Lateral barring
7624135	7626889	rnf6	ENSGACG00000003167	21	All-family	Lateral barring
7637346	7667969	atp8a2	ENSGACG00000003172	21	All-family	Lateral barring
7671202	7675537	shisa2b	ENSGACG00000003182	21	All-family	Lateral barring
7677215	7682182	spice1	ENSGACG00000003186	21	All-family	Lateral barring
7723318	7731230	usf3	ENSGACG00000003204	21	All-family	Lateral barring
7733155	7735833	naa50	ENSGACG00000003207	21	All-family	Lateral barring
7736424	7743329	ATP6V1A	ENSGACG00000003211	21	All-family	Lateral barring
7745465	7753370	gramd1c	ENSGACG00000003247	21	All-family	Lateral barring
7755188	7758807	zdhhc23b	ENSGACG00000003251	21	All-family	Lateral barring
7759788	7768352	ccdc191	ENSGACG00000003254	21	All-family	Lateral barring
7769230	7778698	qtrt2	ENSGACG00000003260	21	All-family	Lateral barring
7795884	7805381	drd3	ENSGACG00000003265	21	All-family	Lateral barring
7818517	7820965	ccdc58	ENSGACG00000003271	21	All-family	Lateral barring
7822811	7823817	fam162a	ENSGACG00000003283	21	All-family	Lateral barring
7826291	7829831	kpna1	ENSGACG00000003285	21	All-family	Lateral barring
7864273	7882478	vipr1b	ENSGACG00000003341	21	All-family	Lateral barring
7893059	7895865	sec22c	ENSGACG00000003352	21	All-family	Lateral barring
7897113	7908066	nktr	ENSGACG00000003367	21	All-family	Lateral barring
7907392	7924736	zbtb47b	ENSGACG00000003372	21	All-family	Lateral barring
7930472	7933232	klhl40b	ENSGACG00000003377	21	All-family	Lateral barring
7934264	7940049	hhatlb	ENSGACG00000003389	21	All-family	Lateral barring
7998529	8004383	gars1	ENSGACG00000003410	21	All-family	Lateral barring
8008624	8027043	ctdspla	ENSGACG00000003452	21	All-family	Lateral barring
8029734	8038141	vill	ENSGACG00000003464	21	All-family	Lateral barring
8038185	8047381	plcd1a	ENSGACG00000003489	21	All-family	Lateral barring
8049185	8059209	dlec1	ENSGACG00000003500	21	All-family	Lateral barring
8073271	8088883	map3k22	ENSGACG00000003515	21	All-family	Lateral barring
8091383	8096316	cry-dash	ENSGACG00000003525	21	All-family	Lateral barring
8096641	8099613	myd88	ENSGACG00000003543	21	All-family	Lateral barring
8131607	8134827	slc22a13b	ENSGACG00000003553	21	All-family	Lateral barring
8204341	8207525	csrnp1b	ENSGACG00000003601	21	All-family	Lateral barring
8233941	8235191	slc35g2b	ENSGACG00000003606	21	All-family	Lateral barring
8246767	8256025	nck1b	ENSGACG00000003608	21	All-family	Lateral barring
8259730	8263422	bdh1	ENSGACG00000003614	21	All-family	Lateral barring
8263488	8269613	gyg1b	ENSGACG00000003621	21	All-family	Lateral barring
8270942	8275067	cpb1	ENSGACG00000003626	21	All-family	Lateral barring
8276903	8278051	agtr1b	ENSGACG00000003676	21	All-family	Lateral barring
8365368	8367504	zic1	ENSGACG00000003678	21	All-family	Lateral barring
8371310	8374828	zic4	ENSGACG00000003685	21	All-family	Lateral barring
8450131	8453357	si:ch73-206p6.1	ENSGACG00000003687	21	All-family	Lateral barring
8463791	8480381	plod2	ENSGACG00000003693	21	All-family	Lateral barring
8596537	8610194	dipk2aa	ENSGACG00000003735	21	All-family	Lateral barring
8652848	8654119	chst2b	ENSGACG00000003738	21	All-family	Lateral barring
8657526	8667355	trpc1	ENSGACG00000003740	21	All-family	Lateral barring
8668876	8674993	pcolce2b	ENSGACG00000003756	21	All-family	Lateral barring
8675482	8684814	u2surp	ENSGACG00000003763	21	All-family	Lateral barring
8684952	8697445	acad11	ENSGACG00000003774	21	All-family	Lateral barring
8690064	8691104	ackr4b	ENSGACG00000003814	21	All-family	Lateral barring
8697712	8700369	uba5	ENSGACG00000003816	21	All-family	Lateral barring
8701525	8708743	nphp3	ENSGACG00000003823	21	All-family	Lateral barring
8712804	8748141	si:ch211-28517.1	ENSGACG00000003838	21	All-family	Lateral barring
8793003	8793878	otud1	ENSGACG00000003846	21	All-family	Lateral barring
8805170	8837399	dlgap1b	ENSGACG00000003847	21	All-family	Lateral barring
8898748	8903535	htr5ab	ENSGACG00000003858	21	All-family	Lateral barring
8925778	8930097	insig1	ENSGACG00000003865	21	All-family	Lateral barring
8942991	8945741	en2a	ENSGACG00000003888	21	All-family	Lateral barring
8997496	9005094	shha	ENSGACG00000003893	21	All-family	Lateral barring	Yes	Human, mice, zebrafish
9044862	9052154	rnf32	ENSGACG00000003909	21	All-family	Lateral barring
9054751	9077438	lmbr1	ENSGACG00000003913	21	All-family	Lateral barring
9086091	9088074	mnx1	ENSGACG00000003933	21	All-family	Lateral barring
9093269	9112777	ube3c	ENSGACG00000003936	21	All-family	Lateral barring
9122453	9128121	dnajb6b	ENSGACG00000003949	21	All-family	Lateral barring
9149836	9149906	MIR153-2	ENSGACG00000021285	21	All-family	Lateral barring
9235824	9242703	ncapg2	ENSGACG00000003962	21	All-family	Lateral barring
9244795	9263251	esyt2b	ENSGACG00000003965	21	All-family	Lateral barring
9264263	9270619	wdr60	ENSGACG00000003976	21	All-family	Lateral barring
9277864	9280061	si:ch73-174h16.4	ENSGACG00000003991	21	All-family	Lateral barring
9286142	9310261	malrd1	ENSGACG00000003994	21	All-family	Lateral barring
9320032	9367907	PLXDC2	ENSGACG00000004008	21	All-family	Lateral barring
9377004	9379096	chmp4c	ENSGACG00000004022	21	All-family	Lateral barring
9379461	9381939	zfand1	ENSGACG00000004034	21	All-family	Lateral barring
9382886	9387516	Maf1	ENSGACG00000004036	21	All-family	Lateral barring
9389963	9394107	arl8	ENSGACG00000004052	21	All-family	Lateral barring
9394952	9399420	nsun6	ENSGACG00000004059	21	All-family	Lateral barring
9401018	9408367	cacnb2a	ENSGACG00000004067	21	All-family	Lateral barring
9441247	9448020	SLC39A12	ENSGACG00000004075	21	All-family	Lateral barring
9448709	9457454	mrc1a	ENSGACG00000004079	21	All-family	Lateral barring
9459066	9461366	TMEM236	ENSGACG00000004092	21	All-family	Lateral barring
9461934	9465952	hacd1	ENSGACG00000004096	21	All-family	Lateral barring
9467911	9486295	COLEC12	ENSGACG00000004102	21	All-family	Lateral barring
9493991	9497705	tyms	ENSGACG00000004111	21	All-family	Lateral barring	Yes	Human, mice, zebrafish
9497746	9502037	enosf1	ENSGACG00000004128	21	All-family	Lateral barring
9503429	9510805	YES1	ENSGACG00000004157	21	All-family	Lateral barring
9519809	9524320	adcyap1a	ENSGACG00000004163	21	All-family	Lateral barring
9558117	9564001	mettl4	ENSGACG00000004176	21	All-family	Lateral barring
9568871	9578857	smchd1	ENSGACG00000004186	21	All-family	Lateral barring	Yes	Human, mice, zebrafish
9579737	9586829	emilin2b	ENSGACG00000004197	21	All-family	Lateral barring
9588132	9594424	LPIN2	ENSGACG00000004201	21	All-family	Lateral barring
9598721	9617679	myom1b	ENSGACG00000004209	21	All-family	Lateral barring
9621052	9623783	MYL12B	ENSGACG00000004252	21	All-family	Lateral barring
9625219	9627988	fastkd3	ENSGACG00000004261	21	All-family	Lateral barring
9628114	9630468	chmp5b	ENSGACG00000004275	21	All-family	Lateral barring
9633015	9636295	OPRK1	ENSGACG00000004282	21	All-family	Lateral barring
9656880	9660496	RGS20	ENSGACG00000004297	21	All-family	Lateral barring
9660659	9663318	lypla1	ENSGACG00000004303	21	All-family	Lateral barring
9663779	9665728	mrpl15	ENSGACG00000004336	21	All-family	Lateral barring
9672279	9673283	sox32	ENSGACG00000004344	21	All-family	Lateral barring
9690607	9692667	sox17	ENSGACG00000004347	21	All-family	Lateral barring
9726185	9739467	vps41	ENSGACG00000004365	21	All-family	Lateral barring
9745682	9801357	pou6f2	ENSGACG00000004422	21	All-family	Lateral barring
9809143	9810199	otulina	ENSGACG00000004435	21	All-family	Lateral barring
9818984	9825988	ankha	ENSGACG00000004445	21	All-family	Lateral barring
9832063	9833686	myca	ENSGACG00000004456	21	All-family	Lateral barring
9903468	9926025	fam49bb	ENSGACG00000004460	21	All-family	Lateral barring
9927423	9930677	si:dkey-37o8.1	ENSGACG00000004505	21	All-family	Lateral barring
9930390	9962816	asap1b	ENSGACG00000004538	21	All-family	Lateral barring
9967184	9974230	NFX1	ENSGACG00000004560	21	All-family	Lateral barring
9984290	9997922	smarcd3b	ENSGACG00000004586	21	All-family	Lateral barring
10001612	10004953	chpf2	ENSGACG00000004595	21	All-family	Lateral barring
10006211	10011276	abcf2a	ENSGACG00000004604	21	All-family	Lateral barring
7192745	7205051	tie1	ENSGACG00000006730	8	All-family	Melanophore density
7220666	7237118	Ap1m3	ENSGACG00000006754	8	All-family	Melanophore density
7241821	7244122	TMEM125	ENSGACG00000006799	8	All-family	Melanophore density
7262834	7265963	Ebna1bp2	ENSGACG00000006802	8	All-family	Melanophore density	Yes	Human, mice, zebrafish
7401543	7460248	lrp8	ENSGACG00000006827	8	All-family	Melanophore density
7475544	7489767	Kank4	ENSGACG00000006846	8	All-family	Melanophore density
7528156	7536467	usp1	ENSGACG00000006853	8	All-family	Melanophore density
7538278	7578385	Dock7	ENSGACG00000006859	8	All-family	Melanophore density	Yes	Human, mice, zebrafish
7564669	7567730	Angptl3	ENSGACG00000006902	8	All-family	Melanophore density
7579767	7586995	atg4c	ENSGACG00000006923	8	All-family	Melanophore density
7700484	7701671	Foxd3	ENSGACG00000006933	8	All-family	Melanophore density	Yes	Human, mice, zebrafish
7707064	7719848	Alg6	ENSGACG00000006934	8	All-family	Melanophore density
7729995	7739728	efcab7	ENSGACG00000006949	8	All-family	Melanophore density
7826645	7851507	ror1	ENSGACG00000007064	8	All-family	Melanophore density
7865143	7913759	Cachd1	ENSGACG00000007086	8	All-family	Melanophore density
7921434	7960181	raver2	ENSGACG00000007122	8	All-family	Melanophore density
7971478	7992100	jak1	ENSGACG00000007145	8	All-family	Melanophore density
7998868	7998941	MIR101-1	ENSGACG00000021395	8	All-family	Melanophore density
8001904	8007260	ak4	ENSGACG00000007168	8	All-family	Melanophore density
8016467	8033959	Dnajc6	ENSGACG00000007183	8	All-family	Melanophore density
8049501	8059467	lepr	ENSGACG00000007200	8	All-family	Melanophore density
8080206	8084699	ttc22	ENSGACG00000007207	8	All-family	Melanophore density
8091706	8095990	ttc4	ENSGACG00000007214	8	All-family	Melanophore density
8096514	8100827	pars2	ENSGACG00000007240	8	All-family	Melanophore density
8109111	8128099	sgip1a	ENSGACG00000007249	8	All-family	Melanophore density
8165344	8238725	pde4ba	ENSGACG00000007263	8	All-family	Melanophore density
8275586	8279961	senp5	ENSGACG00000007271	8	All-family	Melanophore density
8284107	8315383	anos1b	ENSGACG00000007278	8	All-family	Melanophore density
8334646	8346332	Ivns1abpa	ENSGACG00000007288	8	All-family	Melanophore density
8424316	8425927	Arpc5b	ENSGACG00000007368	8	All-family	Melanophore density
8431204	8445294	pla2g4ab	ENSGACG00000007373	8	All-family	Melanophore density
8446071	8450585	Ptgs2b	ENSGACG00000007384	8	All-family	Melanophore density
8465078	8467677	pdcb	ENSGACG00000007435	8	All-family	Melanophore density
8471991	8496300	tprb	ENSGACG00000007456	8	All-family	Melanophore density
8519939	8540860	fcho1	ENSGACG00000007515	8	All-family	Melanophore density
8542911	8565618	rfx2	ENSGACG00000007541	8	All-family	Melanophore density
8571604	8578871	Acsbg2	ENSGACG00000007559	8	All-family	Melanophore density
8587594	8599653	Milt1a	ENSGACG00000007614	8	All-family	Melanophore density
8601701	8605432	acer1	ENSGACG00000007629	8	All-family	Melanophore density
8608236	8612174	myo1f	ENSGACG00000007641	8	All-family	Melanophore density
8625098	8649744	Adamts10	ENSGACG00000007650	8	All-family	Melanophore density
8663745	8669341	zap70	ENSGACG00000007669	8	All-family	Melanophore density
8672758	8675282	Mob3a	ENSGACG00000007678	8	All-family	Melanophore density
8680085	8688792	mknk2b	ENSGACG00000007681	8	All-family	Melanophore density
8695861	8705375	rexo1	ENSGACG00000007701	8	All-family	Melanophore density
8712395	8715506	Zgc:101100	ENSGACG00000007726	8	All-family	Melanophore density
8719592	8743199	csnk1g2b	ENSGACG00000007733	8	All-family	Melanophore density
8754264	8763512	Si:ch73-616d6.3	ENSGACG00000007760	8	All-family	Melanophore density
8767315	8772605	Nr2f6b	ENSGACG00000007766	8	All-family	Melanophore density
8790043	8792361	babam1	ENSGACG00000007777	8	All-family	Melanophore density
8794763	8799364	Plvapb	ENSGACG00000007785	8	All-family	Melanophore density
8801427	8811156	Gtpbp3	ENSGACG00000007790	8	All-family	Melanophore density	Yes	Human, mice, zebrafish
8814476	8840068	ano8b	ENSGACG00000007802	8	All-family	Melanophore density
8844184	8845999	dda1	ENSGACG00000007816	8	All-family	Melanophore density
8849666	8851978	Abhd8b	ENSGACG00000007838	8	All-family	Melanophore density
8853903	8869102	ptprc	ENSGACG00000007843	8	All-family	Melanophore density
8897020	8952064	nek7	ENSGACG00000007863	8	All-family	Melanophore density
8957647	8967593	lhx9	ENSGACG00000007885	8	All-family	Melanophore density
9015730	9058779	DENND1B	ENSGACG00000007908	8	All-family	Melanophore density
9102868	9105860	Nphs2	ENSGACG00000007929	8	All-family	Melanophore density
9140859	9141772	Si:dkey-193b15.8	ENSGACG00000007937	8	All-family	Melanophore density
9149275	9226883	RABGAP1L	ENSGACG00000007940	8	All-family	Melanophore density
9174232	9177224	gpr52	ENSGACG00000007955	8	All-family	Melanophore density
9229475	9232531	Si:ch211-197g15.10	ENSGACG00000007958	8	All-family	Melanophore density
9263822	9271184	arrdc2	ENSGACG00000007983	8	All-family	Melanophore density
9278187	9279904	uba52	ENSGACG00000008021	8	All-family	Melanophore density
9282717	9296560	homer3b	ENSGACG00000008041	8	All-family	Melanophore density
9309879	9315354	ddx49	ENSGACG00000008047	8	All-family	Melanophore density
9318265	9327963	upf1	ENSGACG00000008078	8	All-family	Melanophore density
9331742	9335939	PGPEP1	ENSGACG00000008132	8	All-family	Melanophore density
9336459	9339633	Lsm4	ENSGACG00000008140	8	All-family	Melanophore density
9352990	9360716	rab3ab	ENSGACG00000008173	8	All-family	Melanophore density
9367949	9370029	mpv17I2	ENSGACG00000008179	8	All-family	Melanophore density
9448685	9451926	Si:dkey-197i20.6	ENSGACG00000008194	8	All-family	Melanophore density
9458245	9463856	PIK3R2	ENSGACG00000008201	8	All-family	Melanophore density
9474832	9483994	kank3	ENSGACG00000008209	8	All-family	Melanophore density
9507309	9514916	dpp9	ENSGACG00000008230	8	All-family	Melanophore density
9517721	9533991	dazap1	ENSGACG00000008259	8	All-family	Melanophore density
9538892	9542333	gamt	ENSGACG00000008306	8	All-family	Melanophore density
9544330	9549068	Ndufs7	ENSGACG00000008341	8	All-family	Melanophore density
9567695	9586061	Arid3a	ENSGACG00000008378	8	All-family	Melanophore density
9600585	9604985	R3hdm4	ENSGACG00000008385	8	All-family	Melanophore density
9608799	9628295	ABCA7	ENSGACG00000008403	8	All-family	Melanophore density
9630522	9634078	APBA3	ENSGACG00000008431	8	All-family	Melanophore density
9637395	9639573	pex11g	ENSGACG00000008438	8	All-family	Melanophore density
9670476	9676889	slc35e1	ENSGACG00000008469	8	All-family	Melanophore density
9683907	9684821	smim7	ENSGACG00000008480	8	All-family	Melanophore density
9685505	9692359	Tmem33a	ENSGACG00000008482	8	All-family	Melanophore density
9695227	9702494	Comp	ENSGACG00000008558	8	All-family	Melanophore density
9707987	9716644	crtc1b	ENSGACG00000008574	8	All-family	Melanophore density
9718630	9722114	klhI26	ENSGACG00000008588	8	All-family	Melanophore density
9756535	9773010	mast3b	ENSGACG00000008622	8	All-family	Melanophore density
9776572	9777916	Ndufa7	ENSGACG00000008635	8	All-family	Melanophore density
9795741	9797741	b3gnt3.4	ENSGACG00000008643	8	All-family	Melanophore density
9818037	9827048	jak3	ENSGACG00000008647	8	All-family	Melanophore density
9837722	9845497	Ccdc124	ENSGACG00000008677	8	All-family	Melanophore density
9848019	9853139	Slc5a5	ENSGACG00000008694	8	All-family	Melanophore density
9854537	9855997	Ccdc124	ENSGACG00000008720	8	All-family	Melanophore density
9860367	9863955	KCNN1	ENSGACG00000008741	8	All-family	Melanophore density
9867117	9873320	Uhrf1	ENSGACG00000008745	8	All-family	Melanophore density
9877605	9909505	Kdm4b	ENSGACG00000008762	8	All-family	Melanophore density
10168569	10310850	ptprsa	ENSGACG00000008773	8	All-family	Melanophore density
10327842	10332017	Tbxa2r	ENSGACG00000008804	8	All-family	Melanophore density
10335094	10343570	gipc3	ENSGACG00000008808	8	All-family	Melanophore density
10347300	10358326	Si:zfos-943e10.1	ENSGACG00000008821	8	All-family	Melanophore density
10360921	10363189	lim2.2	ENSGACG00000008838	8	All-family	Melanophore density
10377572	10409618	Campsap2a	ENSGACG00000008858	8	All-family	Melanophore density
10410858	10414982	ddx59	ENSGACG00000008863	8	All-family	Melanophore density
10421883	10430586	kif14	ENSGACG00000008878	8	All-family	Melanophore density
10503534	10559194	Nr5a2	ENSGACG00000008896	8	All-family	Melanophore density
10666166	10666247	MIR181A1	ENSGACG00000021522	8	All-family	Melanophore density
10666396	10666480	MIR181B1	ENSGACG00000021543	8	All-family	Melanophore density
10670600	10676404	Zgc:85936	ENSGACG00000008902	8	All-family	Melanophore density
10677035	10682682	Alpi.2	ENSGACG00000008908	8	All-family	Melanophore density
10684744	10692177	alpi.1	ENSGACG00000008915	8	All-family	Melanophore density
10768726	10769846	nppc	ENSGACG00000008966	8	All-family	Melanophore density
10775000	10780521	ncl	ENSGACG00000008970	8	All-family	Melanophore density
10777237	10777310	SNORD82	ENSGACG00000022904	8	All-family	Melanophore density
10783233	10785335	b3gnt7	ENSGACG00000008999	8	All-family	Melanophore density
10794678	10809981	armc9	ENSGACG00000009002	8	All-family	Melanophore density
10811451	10813116	Polr2h	ENSGACG00000009019	8	All-family	Melanophore density
11024707	11048659	EPHB3	ENSGACG00000009051	8	All-family	Melanophore density
11278291	11279836	Nmur1a	ENSGACG00000009069	8	All-family	Melanophore density
11312464	11328558	Rubcn	ENSGACG00000009086	8	All-family	Melanophore density
11336696	11356157	Tsc22d2	ENSGACG00000009134	8	All-family	Melanophore density
11368224	11373962	pfn2	ENSGACG00000009139	8	All-family	Melanophore density
11376567	11401655	rnf13	ENSGACG00000009180	8	All-family	Melanophore density
11407029	11415653	Pp1r2	ENSGACG00000009192	8	All-family	Melanophore density
11419321	11452012	acap2	ENSGACG00000009198	8	All-family	Melanophore density
11460028	11488636	psmd1	ENSGACG00000009208	8	All-family	Melanophore density
11476798	11480609	Htr2b	ENSGACG00000009251	8	All-family	Melanophore density
11538711	11539923	her6	ENSGACG00000009264	8	All-family	Melanophore density	Yes	Zebrafish
11617064	11645908	opa1	ENSGACG00000009278	8	All-family	Melanophore density
11651792	11674550	atp13a3	ENSGACG00000009295	8	All-family	Melanophore density
11686865	11691542	lsg1	ENSGACG00000009323	8	All-family	Melanophore density
11692873	11693913	Fam43a	ENSGACG00000009337	8	All-family	Melanophore density
11748069	11761926	Xxylt1	ENSGACG00000009343	8	All-family	Melanophore density
11764463	11771444	Srsf11	ENSGACG00000009346	8	All-family	Melanophore density
11773860	11791028	Ankrd13c	ENSGACG00000009375	8	All-family	Melanophore density
11792519	11801115	Cthl	ENSGACG00000009382	8	All-family	Melanophore density
11832369	11833803	ptgr3	ENSGACG00000009453	8	All-family	Melanophore density
11834991	11838840	zranb3	ENSGACG00000009457	8	All-family	Melanophore density
11917528	11996766	Negr1	ENSGACG00000009483	8	All-family	Melanophore density
12030003	12039117	vtg3	ENSGACG00000009490	8	All-family	Melanophore density
12041725	12054205	adgrl4	ENSGACG00000009517	8	All-family	Melanophore density	Yes
12179477	12229465	adgrl2	ENSGACG00000009545	8	All-family	Melanophore density
12379136	12431134	ttll7	ENSGACG00000009588	8	All-family	Melanophore density
12451527	12452038	Samd13	ENSGACG00000009628	8	All-family	Melanophore density
12452845	12462417	uox	ENSGACG00000009633	8	All-family	Melanophore density
12463843	12466855	dnase2b	ENSGACG00000009671	8	All-family	Melanophore density
12476976	12481711	SPATA1	ENSGACG00000009692	8	All-family	Melanophore density
12482039	12487949	Ctbs	ENSGACG00000009697	8	All-family	Melanophore density
12532302	12536890	Ssx2ipb	ENSGACG00000009802	8	All-family	Melanophore density
12552722	12556194	lpar3	ENSGACG00000009820	8	All-family	Melanophore density
12558656	12569003	Mcoln2	ENSGACG00000009823	8	All-family	Melanophore density
12582271	12585862	Ftsj3	ENSGACG00000009841	8	All-family	Melanophore density
12586609	12588386	plaat1	ENSGACG00000009850	8	All-family	Melanophore density
12590614	12601034	mfn1b	ENSGACG00000009857	8	All-family	Melanophore density
12606366	12612737	GNB4	ENSGACG00000009890	8	All-family	Melanophore density
12622780	12626032	Aldh7a1	ENSGACG00000009931	8	All-family	Melanophore density
12626138	12633450	actl6a	ENSGACG00000009940	8	All-family	Melanophore density
12633935	12635757	Mrpl47	ENSGACG00000009992	8	All-family	Melanophore density
12636042	12638806	ndufb5	ENSGACG00000009997	8	All-family	Melanophore density
12640083	12660820	usp13	ENSGACG00000010015	8	All-family	Melanophore density	Yes	Human, mice, zebrafish
12667139	12695380	Pex5la	ENSGACG00000010027	8	All-family	Melanophore density
12761712	12774504	ccdc50	ENSGACG00000010040	8	All-family	Melanophore density
12787013	12820769	P3h2	ENSGACG00000010066	8	All-family	Melanophore density
12822398	12825221	ccdc181	ENSGACG00000010075	8	All-family	Melanophore density
12827343	12831316	cpox	ENSGACG00000010082	8	All-family	Melanophore density
12833534	12837661	prrg1	ENSGACG00000010095	8	All-family	Melanophore density
12839505	12844262	TMEM47	ENSGACG00000010104	8	All-family	Melanophore density
12846546	12851128	tab3	ENSGACG00000010107	8	All-family	Melanophore density
12857578	12864611	nexn	ENSGACG00000010119	8	All-family	Melanophore density
12865975	12871586	Si:dkey-30h22.11	ENSGACG00000010129	8	All-family	Melanophore density
12884945	12890060	Zgc:153738	ENSGACG00000010143	8	All-family	Melanophore density
12914092	12928021	obscna	ENSGACG00000010184	8	All-family	Melanophore density
12928094	12932946	Guk1b	ENSGACG00000010211	8	All-family	Melanophore density
12934426	12957535	RNF220	ENSGACG00000010240	8	All-family	Melanophore density
12974545	12981383	dmap1	ENSGACG00000010250	8	All-family	Melanophore density
12983218	12990504	Hnrnpm	ENSGACG00000010265	8	All-family	Melanophore density
12990728	12996350	timm44	ENSGACG00000010289	8	All-family	Melanophore density
13018635	13018883	CTXN1	ENSGACG00000010319	8	All-family	Melanophore density
13022532	13062921	Fbn2b	ENSGACG00000010321	8	All-family	Melanophore density	Yes	Zebrafish
13088452	13094647	Cers4a	ENSGACG00000010353	8	All-family	Melanophore density
13098906	13100128	lsm7	ENSGACG00000010390	8	All-family	Melanophore density
13108607	13109964	timm13	ENSGACG00000010398	8	All-family	Melanophore density
13114567	13117231	enc3	ENSGACG00000010425	8	All-family	Melanophore density
13135192	13149466	Arhgef18b	ENSGACG00000010468	8	All-family	Melanophore density
13174745	13231603	INSR	ENSGACG00000010475	8	All-family	Melanophore density
13247354	13252601	use1	ENSGACG00000010489	8	All-family	Melanophore density
13255573	13285202	MYO9B	ENSGACG00000010494	8	All-family	Melanophore density
13303558	13304625	S1pr4	ENSGACG00000010526	8	All-family	Melanophore density
13312755	13312824	Mir24-4	ENSGACG00000021495	8	All-family	Melanophore density
13335579	13342295	Ncln	ENSGACG00000010528	8	All-family	Melanophore density
13347669	13362635	cers1	ENSGACG00000010560	8	All-family	Melanophore density
13363920	13370379	cope	ENSGACG00000010568	8	All-family	Melanophore density
13371038	13381199	tnfaip8I1	ENSGACG00000010593	8	All-family	Melanophore density
13397200	13402356	mydgf	ENSGACG00000010612	8	All-family	Melanophore density
13406915	13410357	Loxl5a	ENSGACG00000010616	8	All-family	Melanophore density
13412538	13415719	mibp	ENSGACG00000010621	8	All-family	Melanophore density
13418892	13423838	atcaya	ENSGACG00000010652	8	All-family	Melanophore density
13426914	13440200	Zfr2	ENSGACG00000010658	8	All-family	Melanophore density
13441595	13448803	matk	ENSGACG00000010666	8	All-family	Melanophore density
13455374	13459166	rx1	ENSGACG00000010707	8	All-family	Melanophore density
13487084	13491514	frz1a	ENSGACG00000010712	8	All-family	Melanophore density
13491873	13497931	Haus5	ENSGACG00000010745	8	All-family	Melanophore density
13499791	13512424	sin3b	ENSGACG00000010766	8	All-family	Melanophore density
13518062	13531647	xpr1a	ENSGACG00000010782	8	All-family	Melanophore density
13567772	13591299	Acbd6	ENSGACG00000010822	8	All-family	Melanophore density
13598498	13605960	lhx4	ENSGACG00000010846	8	All-family	Melanophore density
13614287	13635116	qsox1	ENSGACG00000010853	8	All-family	Melanophore density
13638656	13662955	cep350	ENSGACG00000010862	8	All-family	Melanophore density
13695203	13733832	cacna1ea	ENSGACG00000010867	8	All-family	Melanophore density
13741343	13756385	Si:dkey-21p1.3	ENSGACG00000010884	8	All-family	Melanophore density
13758385	13763961	soat1	ENSGACG00000010924	8	All-family	Melanophore density
13765907	13784759	Abl2	ENSGACG00000010969	8	All-family	Melanophore density
13788592	13811533	osbpl9	ENSGACG00000010999	8	All-family	Melanophore density
13814720	13814800	snord24	ENSGACG00000022899	8	All-family	Melanophore density
13817456	13821297	Tor3a	ENSGACG00000011032	8	All-family	Melanophore density
13822767	13826659	Calr3	ENSGACG00000011040	8	All-family	Melanophore density
13828647	13846327	eps15	ENSGACG00000011065	8	All-family	Melanophore density
13854280	13863241	ttc39a	ENSGACG00000011083	8	All-family	Melanophore density
13865467	13872523	Rnf11b	ENSGACG00000011114	8	All-family	Melanophore density
13877521	13879601	Cdkn2c	ENSGACG00000011122	8	All-family	Melanophore density
13888734	13937931	faf1	ENSGACG00000011131	8	All-family	Melanophore density
13948367	13950370	Dmrta2	ENSGACG00000011145	8	All-family	Melanophore density
13997640	14027578	Elavl4	ENSGACG00000011152	8	All-family	Melanophore density
14210524	14216449	bend5	ENSGACG00000011164	8	All-family	Melanophore density
14243555	14258303	agbl4	ENSGACG00000011171	8	All-family	Melanophore density
14282863	14288009	gclm	ENSGACG00000011182	8	All-family	Melanophore density
14292465	14293697	ccl25b	ENSGACG00000011219	8	All-family	Melanophore density
14302056	14303400	pole4	ENSGACG00000011233	8	All-family	Melanophore density
14314442	14321938	Slc1a6	ENSGACG00000011239	8	All-family	Melanophore density
14325303	14328403	Tax1bp3	ENSGACG00000011267	8	All-family	Melanophore density
14336195	14339520	rab8a	ENSGACG00000011272	8	All-family	Melanophore density	Yes	Human, mice, zebrafish
14348056	14365334	tpm4a	ENSGACG00000011294	8	All-family	Melanophore density
14378137	14396802	Si:ch1073-396h14.1	ENSGACG00000011305	8	All-family	Melanophore density
14405764	14412687	lpl	ENSGACG00000011354	8	All-family	Melanophore density
14421114	14427943	safb	ENSGACG00000011385	8	All-family	Melanophore density
14436962	14438823	fam32a	ENSGACG00000011396	8	All-family	Melanophore density
14441325	14443294	fh	ENSGACG00000011403	8	All-family	Melanophore density
14444287	14449733	hdgfl2	ENSGACG00000011407	8	All-family	Melanophore density
14453499	14470317	Ap3d1	ENSGACG00000011421	8	All-family	Melanophore density	Yes	Human, mice, zebrafish
14473656	14481488	cdc34a	ENSGACG00000011444	8	All-family	Melanophore density
14527394	14529615	Gna15.3	ENSGACG00000011472	8	All-family	Melanophore density
14537972	14553123	Gna11a	ENSGACG00000011473	8	All-family	Melanophore density	Yes	Zebrafish
14614788	14656929	Tle2b	ENSGACG00000011493	8	All-family	Melanophore density
14703805	14706523	Plpp2b	ENSGACG00000011516	8	All-family	Melanophore density
14742945	14743748	s1pr3a	ENSGACG00000011534	8	All-family	Melanophore density
14751428	14767887	shdb	ENSGACG00000011536	8	All-family	Melanophore density
14774013	14783080	ankrd24	ENSGACG00000011545	8	All-family	Melanophore density
14785692	14795435	shc2	ENSGACG00000011551	8	All-family	Melanophore density
14798904	14800255	Cks2	ENSGACG00000011557	8	All-family	Melanophore density
14800817	14802233	Odf3l2b	ENSGACG00000011561	8	All-family	Melanophore density
14808360	14833636	Cpamd8	ENSGACG00000011570	8	All-family	Melanophore density
8260629	8359389	syne1a	ENSGACG00000008721	18	Fam-1	Melanophore density
8375481	8376824	myct1a	ENSGACG00000008796	18	Fam-1	Melanophore density
8378291	8384481	serac1	ENSGACG00000008797	18	Fam-1	Melanophore density
8385313	8385703	gtf2h5	ENSGACG00000008827	18	Fam-1	Melanophore density
8391456	8396793	tmem181	ENSGACG00000008833	18	Fam-1	Melanophore density
8400521	8420584	tulp4a	ENSGACG00000008851	18	Fam-1	Melanophore density
4906950	4919078	nfkb1	ENSGACG00000016876	4	Fam-2	Melanophore density
4928214	4939718	DGKQ	ENSGACG00000016877	4	Fam-2	Melanophore density	Yes	Human, mice, zebrafish
4943222	4986036	mgat4b	ENSGACG00000016886	4	Fam-2	Melanophore density
4958777	4996893	canx	ENSGACG00000016892	4	Fam-2	Melanophore density
15336362	15343508	RSBN1L	ENSGACG00000012053	19.3	Fam-3	Melanophore density
15345209	15345613	TMEM60	ENSGACG00000012059	19.3	Fam-3	Melanophore density
15348293	15350973	prr5a	ENSGACG00000012066	19.3	Fam-3	Melanophore density
15357367	15360484	rad52	ENSGACG00000012071	19.3	Fam-3	Melanophore density
15363106	15382434	wnk1a	ENSGACG00000012079	19.3	Fam-3	Melanophore density
15387902	15399376	erc1a	ENSGACG00000012099	19.3	Fam-3	Melanophore density
15403440	15404642	fbxl14a	ENSGACG00000012113	19.3	Fam-3	Melanophore density
13072726	13085012	adss2	ENSGACG00000010492	6.2	Fam-3	Melanophore density
13101787	13105046	zbtb18	ENSGACG00000010518	6.2	Fam-3	Melanophore density
13147228	13164638	akt3a	ENSGACG00000010522	6.2	Fam-3	Melanophore density
13169103	13202321	sdccag8	ENSGACG00000010549	6.2	Fam-3	Melanophore density
10944595	10949412	krt99	ENSGACG00000018321	9	Fam-3	Melanophore density
10955919	10967510	si:dkey-28e7.3	ENSGACG00000018327	9	Fam-3	Melanophore density
10988528	10993687	jupa	ENSGACG00000018328	9	Fam-3	Melanophore density
10996164	11001903	KCNIP2	ENSGACG00000018330	9	Fam-3	Melanophore density
11006712	11023413	armh3	ENSGACG00000018333	9	Fam-3	Melanophore density
11030049	11034021	ldb1b	ENSGACG00000018336	9	Fam-3	Melanophore density
16274314	16279357	arl6ip1	ENSGACG00000014908	11.2	Fam-3	Melanophore density	Yes	Zebrafish
16290190	16293487	si:dkey-16l2.16	ENSGACG00000014915	11.2	Fam-3	Melanophore density
16294894	16299014	anapc2	ENSGACG00000014924	11.2	Fam-3	Melanophore density
16299933	16304597	rnf25	ENSGACG00000014927	11.2	Fam-3	Melanophore density
16305215	16309455	kat8	ENSGACG00000014930	11.2	Fam-3	Melanophore density
16311211	16319300	xylt1	ENSGACG00000014935	11.2	Fam-3	Melanophore density
16339902	16345476	pigq	ENSGACG00000014938	11.2	Fam-3	Melanophore density
16346601	16349472	eefekmt	ENSGACG00000014940	11.2	Fam-3	Melanophore density
16349289	16353027	alg1	ENSGACG00000014943	11.2	Fam-3	Melanophore density
16357643	16365257	flr	ENSGACG00000014954	11.2	Fam-3	Melanophore density
16526477	16531898	rb1cc1	ENSGACG00000017953	3	Fam-4	Melanophore density
16539413	16584104	AGAP3	ENSGACG00000017955	3	Fam-4	Melanophore density
2011530	2054609	arl15a	ENSGACG00000004624	13	Fam-1	Lateral barring
18312750	18318750	slc24a5	ENSGACG00000016752	2	Fam-1	Lateral barring	Yes	Human, mice, zebrafish
18319192	18327379	myef2	ENSGACG00000016759	2	Fam-1	Lateral barring	Yes	Zebrafish
18331267	18331515	CTXN2	ENSGACG00000016764	2	Fam-1	Lateral barring	Yes	Human
18336482	18346775	slc12a1	ENSGACG00000016765	2	Fam-1	Lateral barring
18349240	18352877	dut	ENSGACG00000016770	2	Fam-1	Lateral barring
18352991	18399386	FBN1	ENSGACG00000016773	2	Fam-1	Lateral barring
5120895	5134417	cavin2a	ENSGACG00000002310	16	Fam-2	Lateral barring
5142264	5223303	tmeff2a	ENSGACG00000002314	16	Fam-2	Lateral barring
5489703	5500160	slc39a10	ENSGACG00000002320	16	Fam-2	Lateral barring
5571474	5582058	si:ch211-219a4.3	ENSGACG00000002353	16	Fam-2	Lateral barring
5588665	5590712	faima	ENSGACG00000002376	16	Fam-2	Lateral barring
5592699	5595163	cxcr2	ENSGACG00000002380	16	Fam-2	Lateral barring
5613907	5615139	cx43.4	ENSGACG00000002384	16	Fam-2	Lateral barring
5658213	5664937	calcrla	ENSGACG00000002387	16	Fam-2	Lateral barring
5748920	5803548	gulp1a	ENSGACG00000002401	16	Fam-2	Lateral barring
5805247	5824442	col5a2a	ENSGACG00000002409	16	Fam-2	Lateral barring
5863099	5885871	slc4a3	ENSGACG00000002501	16	Fam-2	Lateral barring
5906187	5912186	igfbp2b	ENSGACG00000002506	16	Fam-2	Lateral barring
5921243	5930904	igfbp5b	ENSGACG00000002508	16	Fam-2	Lateral barring
6102130	6138401	tns1b	ENSGACG00000002511	16	Fam-2	Lateral barring
21005102	21016637	CCKBR	ENSGACG00000014143	1.2	Fam-2	Lateral barring
21028485	21034777	cpo	ENSGACG00000014144	1.2	Fam-2	Lateral barring
21034424	21036367	nudt15	ENSGACG00000014147	1.2	Fam-2	Lateral barring
21037368	21043291	trim25l	ENSGACG00000014150	1.2	Fam-2	Lateral barring
21044653	21051780	trak2	ENSGACG00000014156	1.2	Fam-2	Lateral barring
21055709	21059805	STRADB	ENSGACG00000014167	1.2	Fam-2	Lateral barring
21063176	21092565	nbeal1	ENSGACG00000014174	1.2	Fam-2	Lateral barring
5862469	5870022	frg1	ENSGACG00000016888	9	Fam-3	Lateral barring
5871663	5875621	asah1b	ENSGACG00000016899	9	Fam-3	Lateral barring
5876362	5892235	pcm1	ENSGACG00000016941	9	Fam-3	Lateral barring
5894096	5896405	SART1	ENSGACG00000016951	9	Fam-3	Lateral barring
5899969	5904360	osbp	ENSGACG00000016955	9	Fam-3	Lateral barring
5907915	5911257	casp3a	ENSGACG00000016960	9	Fam-3	Lateral barring	Yes	Zebrafish
5922022	5929117	stox2a	ENSGACG00000016962	9	Fam-3	Lateral barring
5933346	5960342	tll1	ENSGACG00000016964	9	Fam-3	Lateral barring
218015	221452	rnf150b	ENSGACG00000018594	7	Fam-4	Lateral barring
242336	245534	PPM1K	ENSGACG00000018600	7	Fam-4	Lateral barring
271816	279318	fbxw7	ENSGACG00000018606	7	Fam-4	Lateral barring
280447	282933	anapc10	ENSGACG00000018607	7	Fam-4	Lateral barring
283013	288591	abce1	ENSGACG00000018611	7	Fam-4	Lateral barring
