# Supplementary material for: The genetic basis of divergent melanic pigmentation in benthic and limnetic threespine stickleback
Source: Research Square preprint supplement (doi:10.21203/rs.3.rs-3093539/v1), 2023-06-28
Supplement: Supplementary file 2 [file 936880937f40a48329e505da.docx]

**S1.** Aerial photograph of the experimental pond facility, indicating length and width. Humans are pictures adjacent to the pond for scale. Photo courtesy of Thor Veen.

**
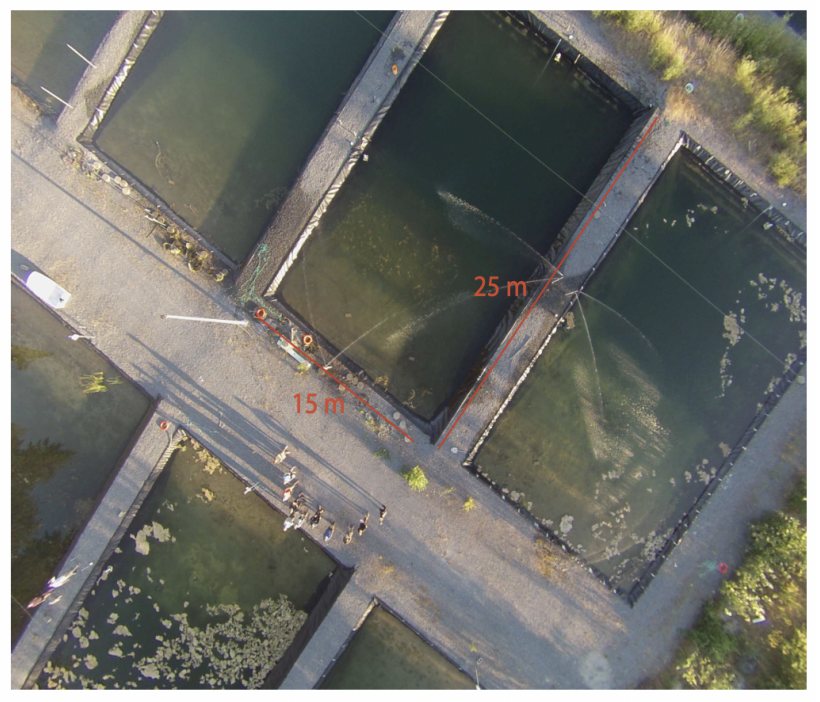
**

**S2.** Experimental setup and timeline. A shared color between ponds indicate they had the same founders.

**
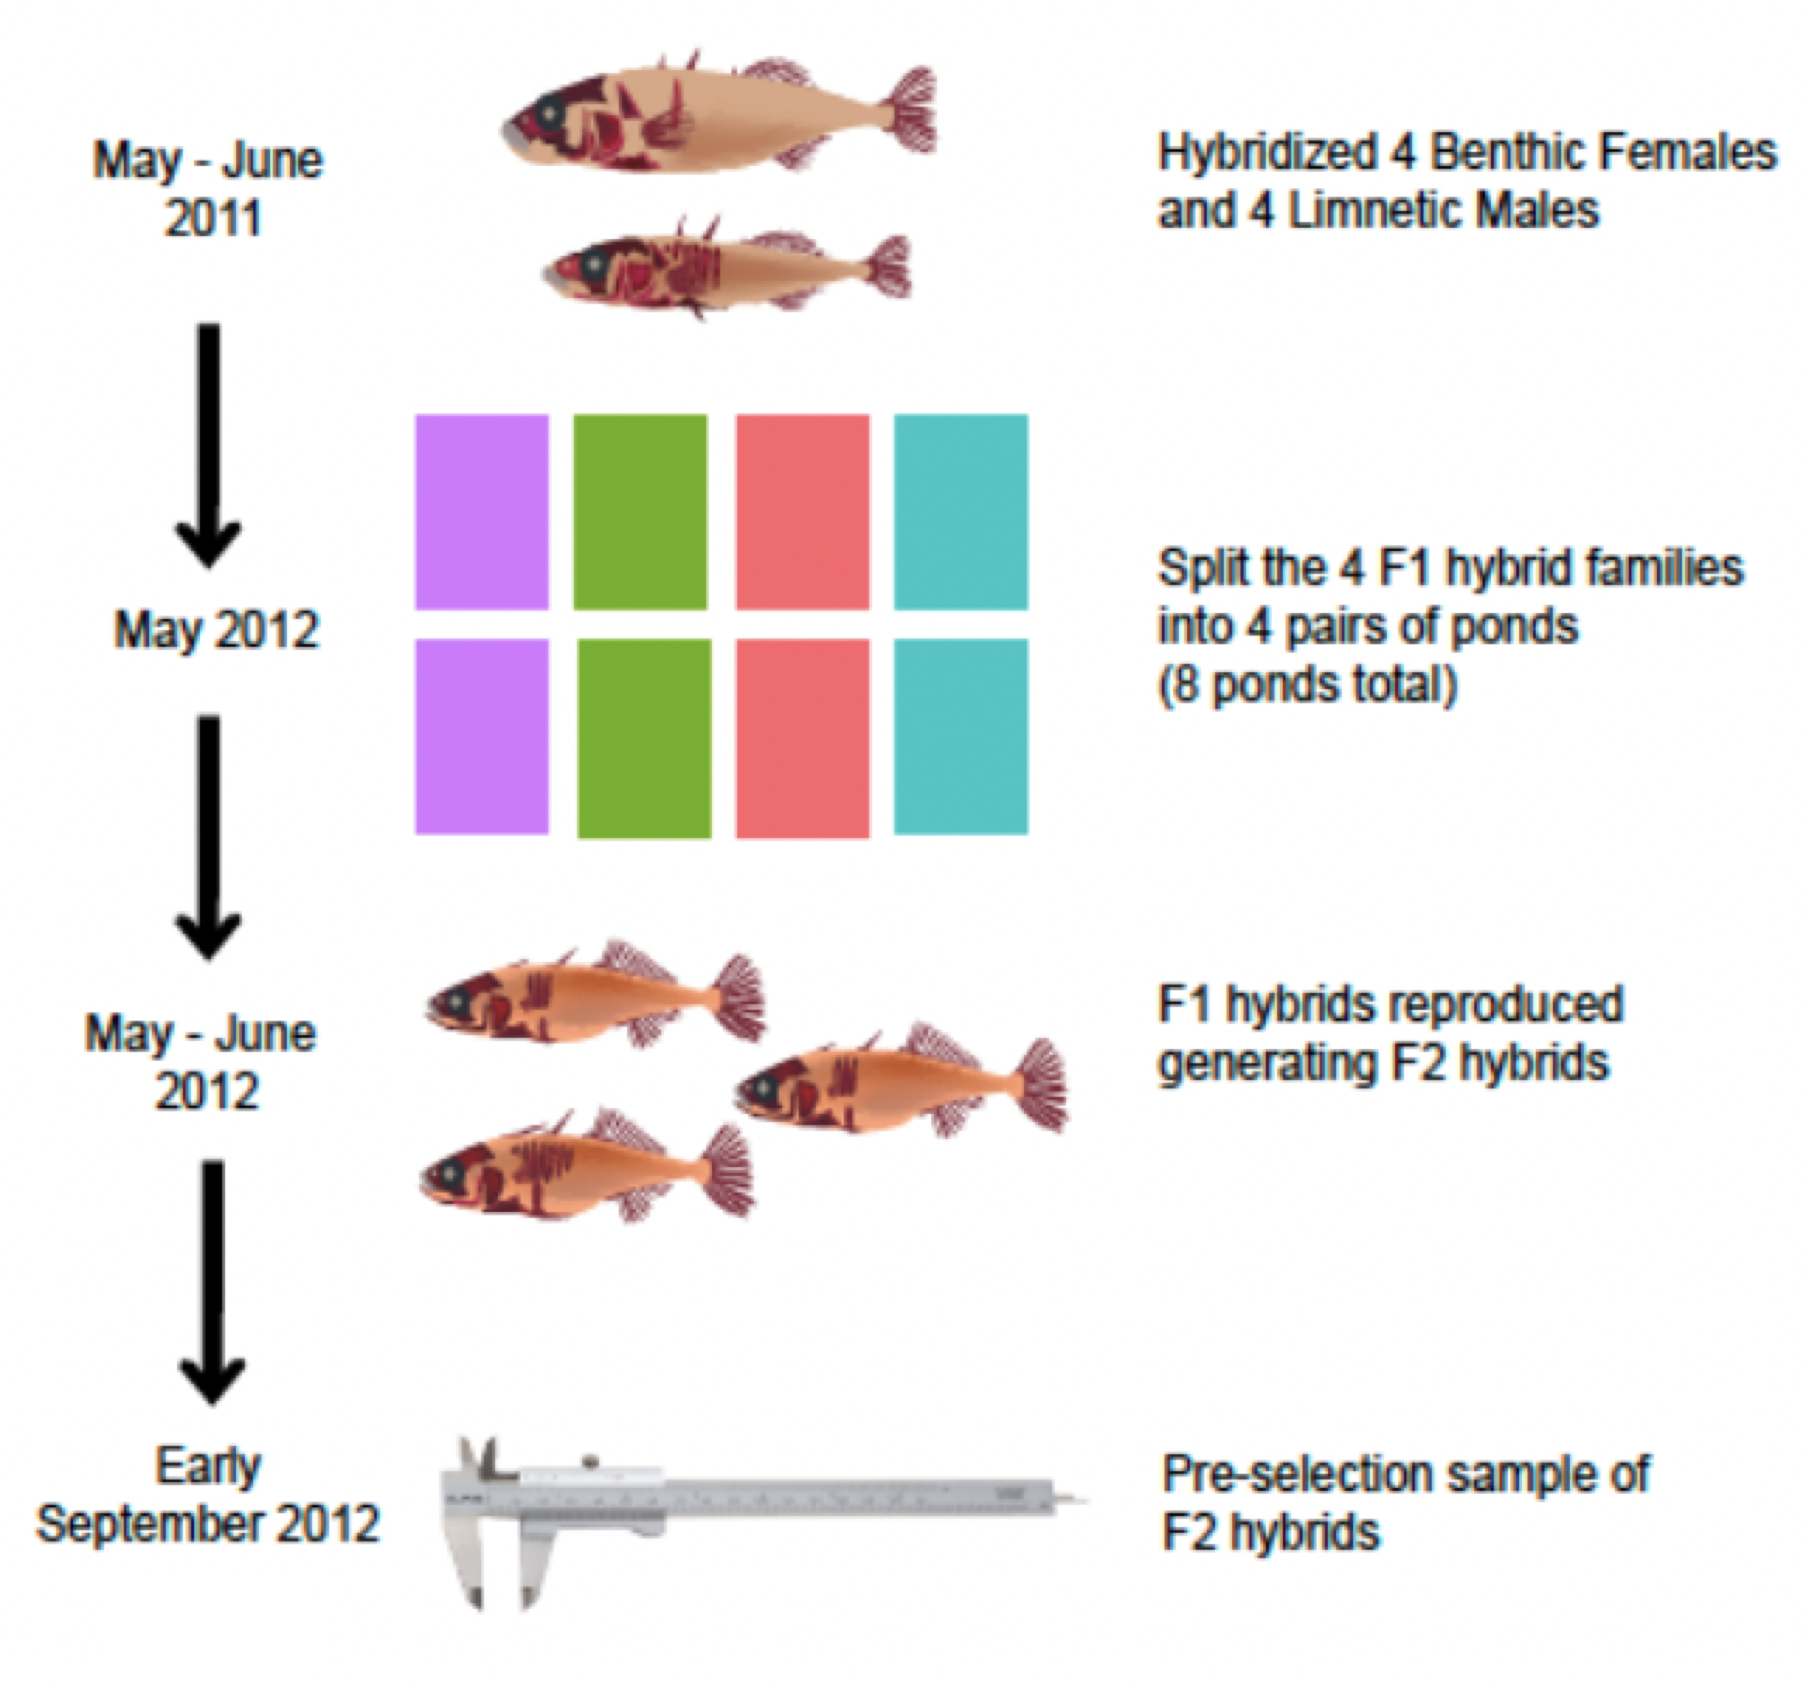
**

**S3.** Melanocyte counting at the fin junction

**
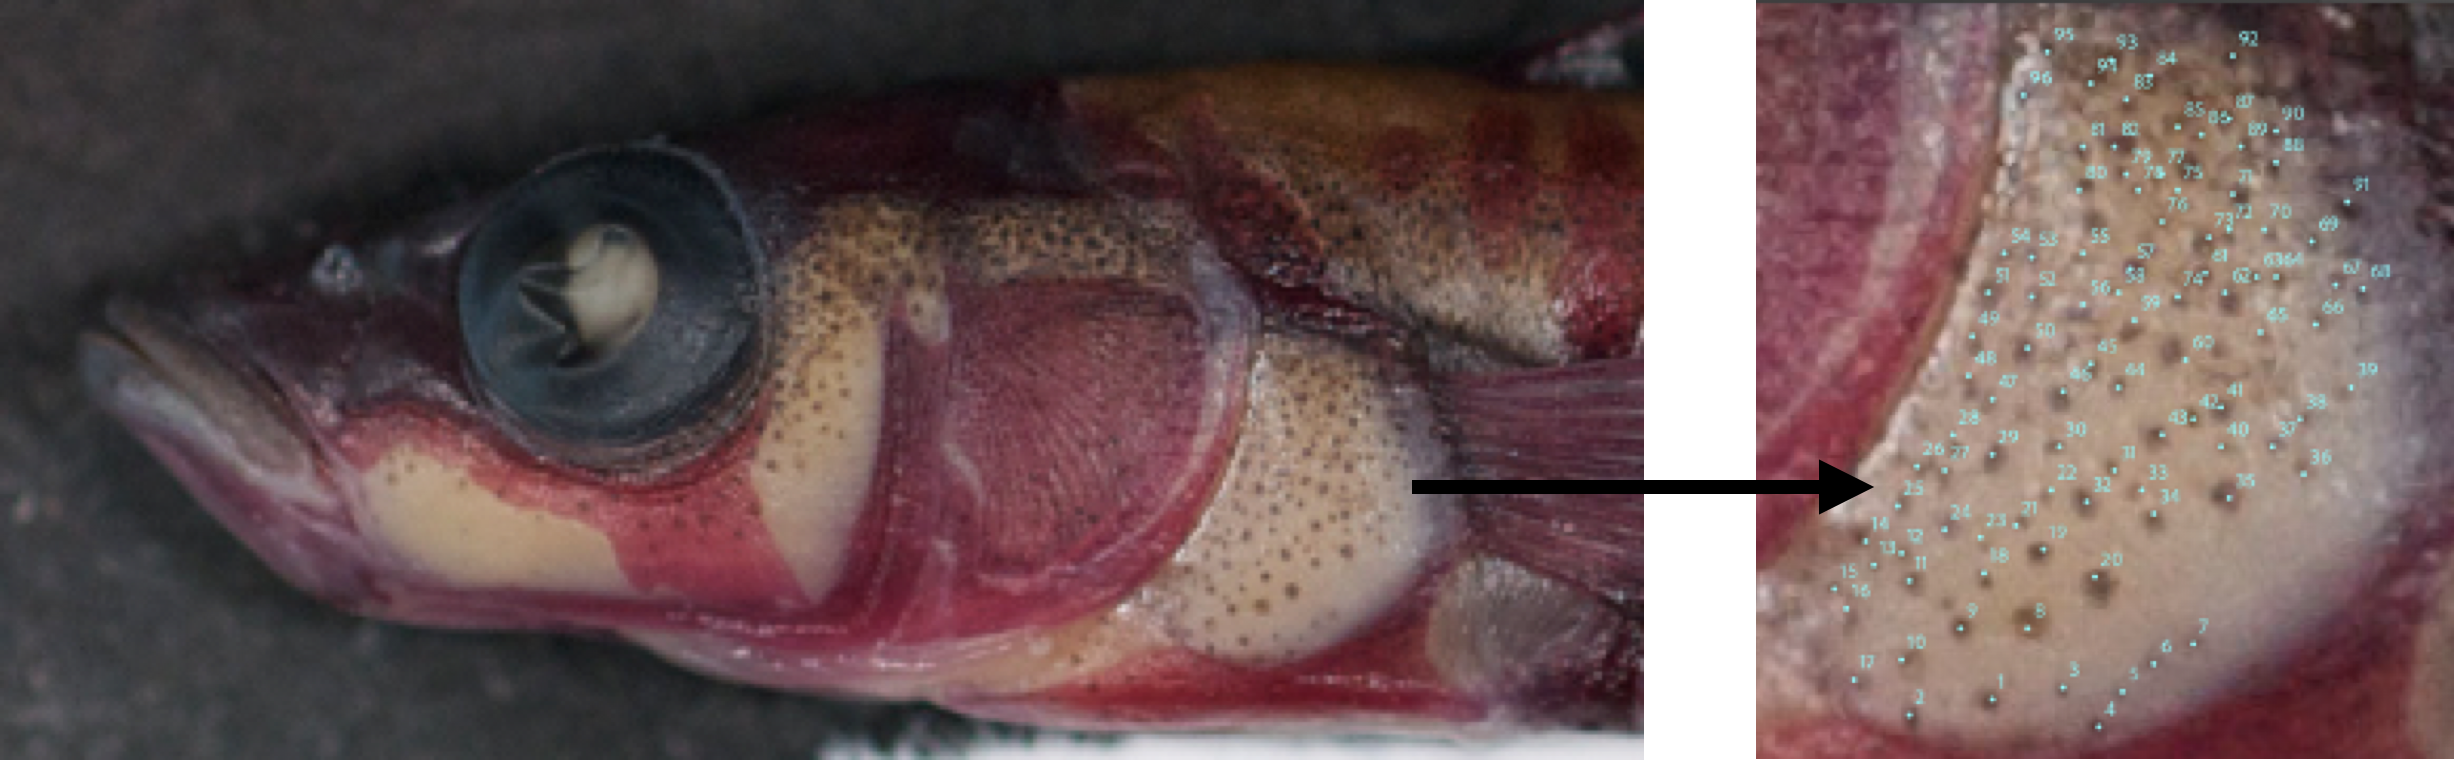
**

**S4.** Lateral barring at the ventral flank

**
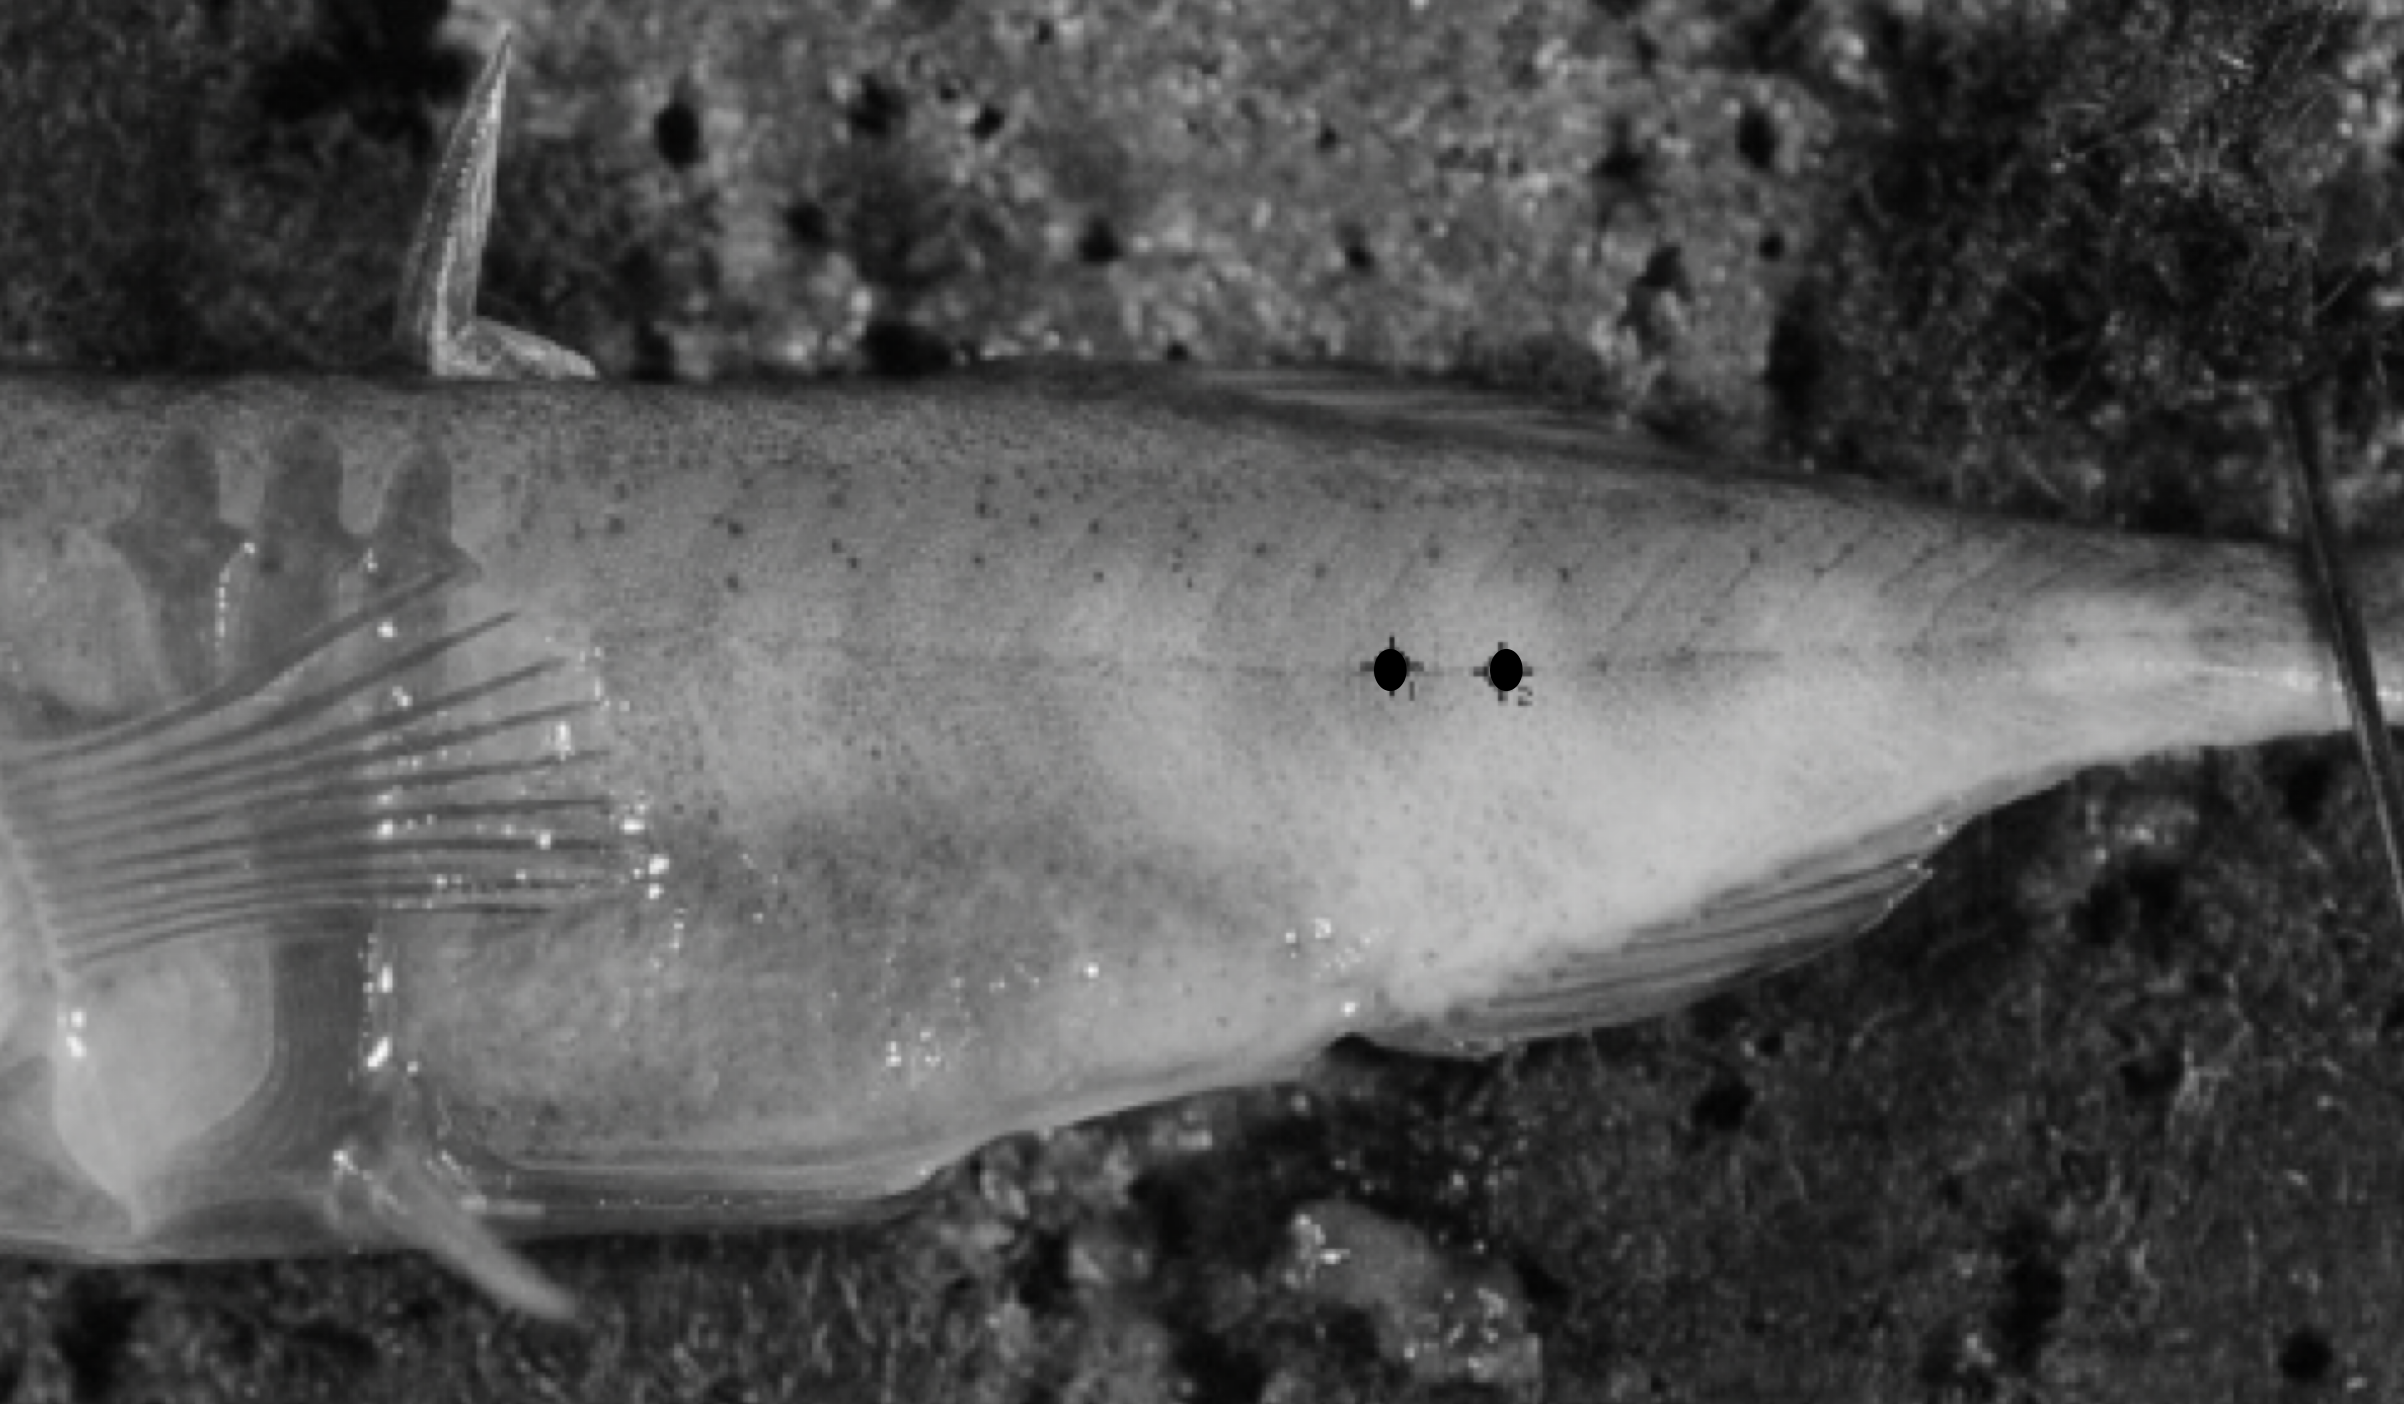
**

**S5.** Marine stickleback photographed against an X-rite color checker passport

**
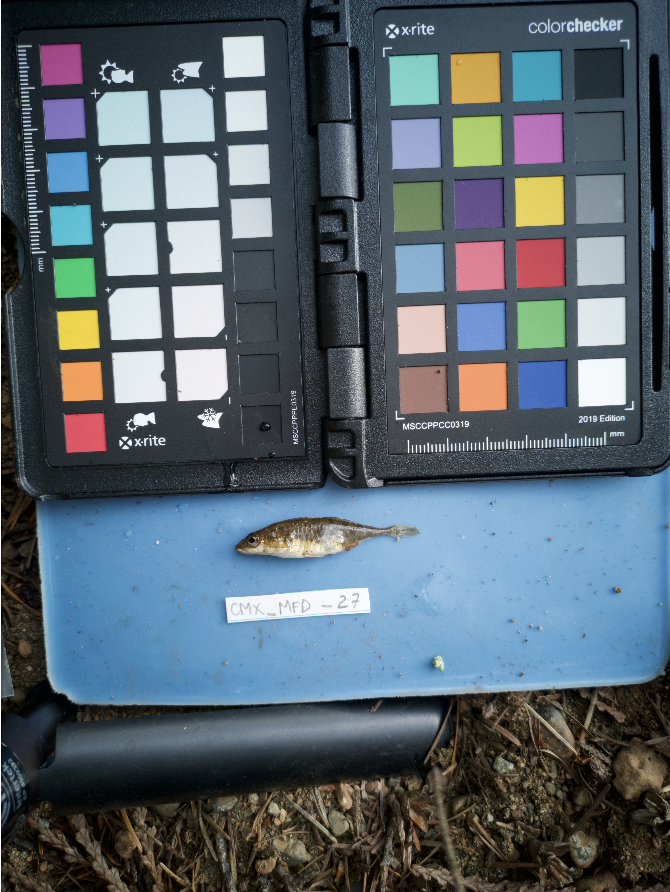
**
